# Supplementary material
Source: PubMed Central journal article supplement (PMC8262057)
Supplement: 13690_2021_647_MOESM1_ESM.pdf [file 13690_2021_647_MOESM1_ESM.pdf]

| APPENDIX 1: Daily Staffing Requirements with Infection Prevention Guidance |                                                                                                                                                                                                                                                                                                                                      |                        |                   |      |              |                |                     |               |              |                |           |        |              |                                                                                                                                                                      |
|----------------------------------------------------------------------------|--------------------------------------------------------------------------------------------------------------------------------------------------------------------------------------------------------------------------------------------------------------------------------------------------------------------------------------|------------------------|-------------------|------|--------------|----------------|---------------------|---------------|--------------|----------------|-----------|--------|--------------|----------------------------------------------------------------------------------------------------------------------------------------------------------------------|
|                                                                            | Job description                                                                                                                                                                                                                                                                                                                      | Location               | Training required |      |              |                | Participant contact | PPE required  |              |                |           |        | PPE changing |                                                                                                                                                                      |
|                                                                            |                                                                                                                                                                                                                                                                                                                                      |                        | PPE               | Flow | Web Platform | Test Procedure |                     | Surgical mask | Maintain 6ft | Eye protection | Gown/Suit | Gloves |              | Respirator                                                                                                                                                           |
| <b>COMMUNITY VOLUNTEERS</b>                                                |                                                                                                                                                                                                                                                                                                                                      |                        |                   |      |              |                |                     |               |              |                |           |        |              |                                                                                                                                                                      |
| Traffic controllers (n=4-5)                                                | Help manage flow of cars                                                                                                                                                                                                                                                                                                             | Parking lot            |                   | X    |              |                | Minimal             | X             | X            |                |           |        |              | One mask daily                                                                                                                                                       |
| Community Greeters (n=2)                                                   | Welcome, give surgical masks to participants. If no appointment, direct back to website or to onsite registration support.                                                                                                                                                                                                           | Parking lot            | X                 | X    | X            |                | Minimal             | X             | X            | X              |           |        |              | One mask daily<br>Can store mask in paper bag for reuse during day.                                                                                                  |
| Interpreters (n=2)                                                         | Translate English to Spanish from start to finish.                                                                                                                                                                                                                                                                                   | All                    | X                 | X    |              |                | Moderate            | X             |              | X              |           |        | X            | Change gloves, hand sanitizer after every participant. all other                                                                                                     |
| <b>MEDICAL VOLUNTEERS</b>                                                  |                                                                                                                                                                                                                                                                                                                                      |                        |                   |      |              |                |                     |               |              |                |           |        |              |                                                                                                                                                                      |
| Triage greeters (n=4)                                                      | Using tablet, confirm participants have appointments, assess if any in car have symptoms (direct to symptom lane).                                                                                                                                                                                                                   |                        | X                 | X    | X            |                | Minimal             | X             | X            | X              |           |        |              | One mask daily<br>Can store mask in paper bag for reuse during day.                                                                                                  |
| Specimen collectors (n=12)                                                 | Briefly explains procedure to participant. First cleans finger, uses lancet to perform finger stick, collect and stores blood. Swabs OP then mid-turbinate, drops capped vial into open bag held open by test assistant.                                                                                                             | Test bay               | X                 | X    |              | X              | Most contact        | X             |              | X              | X         | X      | X            | Change gloves, hand sanitizer after ever participant. All others once per shift. Can reuse N95 mask, store in paper bag.                                             |
| Test assistants (n=12)                                                     | Ask participant name/DOB and whether any day-of symptoms and verbally report to admin in tent. Pick up basket with correctly labeled microtainer, lancet, band aid, alcohol swab. Hand items to tester as needed. Then hand tester swab, viral transport media. Hold open biohazard bag for phlebotomist to drop swab specimen into. | Test bay               | X                 | X    | X            | X              | Moderate            | X             | X            | X              |           |        | X            | Change gloves, hand sanitizer after every participant. all other equipment changed once per shift. Must maintain physical distance, particularly testing procedures. |
| Administrative volunteers (n=6)                                            | Find record in database (after hearing from test assistant), record participant symptoms. Locate pre-printed label. Label 2 containers and place 3rd label on requisition form. Record whether participant received tests successfully.                                                                                              | Inside tent            |                   | X    | X            | X              | Minimal             | X             | X            |                |           |        |              | Change gloves, hand sanitizer after every participant. all other equipment changed once per shift.                                                                   |
| Runners/lab quality control leads (n=2)                                    | Create "test kits" with labeled microtainer, lancet, alcohol swab, gauze, labeled viral transport media, and swab. Ensure specimens secured safely.                                                                                                                                                                                  | Test bay & inside tent |                   | X    |              |                | Minimal             | X             |              |                |           |        | X            |                                                                                                                                                                      |
| <b>LEADERSHIP VOLUNTEERS</b>                                               |                                                                                                                                                                                                                                                                                                                                      |                        |                   |      |              |                |                     |               |              |                |           |        |              |                                                                                                                                                                      |
| Tent supervisor (n=4)                                                      | Help troubleshoot operations, testing procedures, or field questions from participants or volunteers                                                                                                                                                                                                                                 | Inside tent            |                   | X    | X            | X              | Minimal             | X             |              |                |           |        |              | One mask daily<br>Can store mask in paper bag for reuse during day.                                                                                                  |
| Medical director (n=1)                                                     | Help troubleshoot operations, testing procedures, or field questions from participants or volunteers                                                                                                                                                                                                                                 | Inside tent            | X                 | X    | X            | X              | Minimal             | X             |              |                |           |        |              | One mask daily<br>Can store mask in paper bag for reuse during day.                                                                                                  |
