# Supplementary material
Source: PubMed Central journal article supplement (PMC8262057)
Supplement: 13690_2021_647_MOESM2_ESM.pdf [file 13690_2021_647_MOESM2_ESM.pdf]

**APPENDIX 1: Daily screening of study staff by email (based on UCSF Health’s daily screen)**

|                                                                                                                                                                                                                                                                                                                                                                                                   | No                                                  | Yes                                                                                                                                                                                                                     |
|---------------------------------------------------------------------------------------------------------------------------------------------------------------------------------------------------------------------------------------------------------------------------------------------------------------------------------------------------------------------------------------------------|-----------------------------------------------------|-------------------------------------------------------------------------------------------------------------------------------------------------------------------------------------------------------------------------|
| Have you been diagnosed with COVID-19 in the past 14 days?                                                                                                                                                                                                                                                                                                                                        | If no, you may proceed to volunteer.                | If yes, please stay home and notify Bolinas study leadership.                                                                                                                                                           |
| Do you live with someone who has been diagnosed with COVID-19 in the past 14 days?                                                                                                                                                                                                                                                                                                                | If no, you may proceed to volunteer.                | If yes, please stay home and notify Bolinas study leadership.                                                                                                                                                           |
| <p>Have you had any of the following symptoms in the last 14 days (including the last 24 hours)?</p> <ul style="list-style-type: none"> <li>- Fever over 100F</li> <li>- Sore throat</li> <li>- Difficulty breathing</li> <li>- Unexplained muscle aches</li> <li>- Cough</li> <li>- Loss of sense of smell or taste</li> <li>- Nasal congestion different from pre-existing allergies</li> </ul> | If none of the above, you may proceed to volunteer. | <p>If yes to <i>only</i> nasal congestion, it is possible you may proceed to volunteer. Please contact study leadership.</p> <p>If yes to any other symptoms, please stay home and notify Bolinas study leadership.</p> |

|                                                                                                                                                                                                 |                                             |                                                                                                                                                                                                       |
|-------------------------------------------------------------------------------------------------------------------------------------------------------------------------------------------------|---------------------------------------------|-------------------------------------------------------------------------------------------------------------------------------------------------------------------------------------------------------|
| <p>Have you been in unprotected contact with someone diagnosed with COVID-19 in the past 14 days?<br/>(unprotected means without full PPE at work or <i>close</i> contact in the community)</p> | <p>If no, you may proceed to volunteer.</p> | <p>If yes, please stay home and notify Bolinas study leadership.</p>                                                                                                                                  |
| <p>Have you returned from travel outside the US or from NY/NJ/CT in the past 14 days?</p>                                                                                                       | <p>If no, you may proceed to volunteer.</p> | <p>If yes <i>and</i> symptoms, please stay at home and notify Bolinas study leadership.</p> <p>If yes and NO symptoms, you may proceed to volunteer with self-monitoring of symptoms twice daily.</p> |
